# Supplementary material for: Plasma Levels of Free Fatty Acids in Women with Gestational Diabetes and Its Intrinsic and Extrinsic Determinants: Systematic Review and Meta-Analysis
Source: Hindawi journal article supplement (doi:10.1155/2019/7098470), 2019-08-18
Supplement: f1 [file 7098470.f1.pdf]

Supplemental table 1. Newcastle-Ottawa scale for case-control studies

| Study        | Selection | Comparability                    |                             |                           |                              |                                            | Exposure                  | Stars                                               |                   |   |
|--------------|-----------|----------------------------------|-----------------------------|---------------------------|------------------------------|--------------------------------------------|---------------------------|-----------------------------------------------------|-------------------|---|
| Author       | Year      | Is the case definition adequate? | Representativeness of cases | Selectiveness of controls | Definiteness of main outcome | Study controls for the additional outcomes | Ascertainment of exposure | Same method of ascertainment for cases and controls | Non-Response rate |   |
| Lunell       | 1992      | *                                | *                           | *                         | *                            | *                                          | *                         | *                                                   | *                 | 9 |
| Meyer        | 1996      | *                                | *                           | *                         | *                            | *                                          | -                         | *                                                   | *                 | 8 |
| Tsai         | 2005      | *                                | *                           | *                         | *                            | *                                          | -                         | *                                                   | *                 | 8 |
| Bomba Opon   | 2006      | *                                | *                           | *                         | *                            | *                                          | -                         | *                                                   | *                 | 8 |
| Pappa        | 2007      | *                                | *                           | *                         | *                            | *                                          | -                         | *                                                   | *                 | 8 |
| Idzior-Walus | 2008      | *                                | *                           | *                         | *                            | *                                          | *                         | *                                                   | *                 | 9 |
| Buchanan     | 1990      | *                                | *                           | *                         | *                            | *                                          | -                         | *                                                   | *                 | 8 |
| Layton       | 2018      | *                                | *                           | *                         | *                            | *                                          | -                         | *                                                   | *                 | 8 |
| Pappa        | 2005      | *                                | *                           | *                         | *                            | *                                          | -                         | *                                                   | *                 | 8 |
| Xu           | 2015      | *                                | *                           | *                         | *                            | *                                          | *                         | *                                                   | *                 | 9 |
| Zhang        | 2017      | *                                | *                           | *                         | *                            | *                                          | *                         | *                                                   | *                 | 9 |
| Metzger      | 1980      | *                                | -                           | -                         | *                            | *                                          | -                         | *                                                   | *                 | 6 |

PUBMED: 112

("fatty acids, nonesterified"[MeSH Terms] OR ("fatty"[All Fields] AND "acids"[All Fields] AND "nonesterified"[All Fields]) OR "nonesterified fatty acids"[All Fields] OR ("free"[All Fields] AND "fatty"[All Fields] AND "acids"[All Fields]) OR "free fatty acids"[All Fields]) AND ("diabetes, gestational"[MeSH Terms] OR ("diabetes"[All Fields] AND "gestational"[All Fields]) OR "gestational diabetes"[All Fields] OR ("gestational"[All Fields] AND "diabetes"[All Fields])) AND "humans"[MeSH Terms]

SCOPUS: 123

TITTLE-ABS-KEY ( free AND fatty AND acids AND gestational AND diabetes)

WOS: 55

**TEMA:** (free fatty acids) *AND* **TEMA:** (gestational diabetes)

**Refinado por:** [excluyendo] **Bases de datos:** ( MEDLINE )

**Período de tiempo:** Todos los años. **Bases de datos:** WOS, BIOSIS, CABI, CCC, DIIDW, KJD, MEDLINE, RSCI, SCIELO, ZOOREC.

Idioma de búsqueda=Auto
